# Supplementary material for: Voxel-based morphometry predicts shifts in dendritic spine density and morphology with auditory fear conditioning
Source: PubMed Central journal article supplement (PMC4506522; doi:10.1038/ncomms8582), 2015-07-07
Supplement: ncomms8582-s1.pdf [file ncomms8582-s1.pdf]

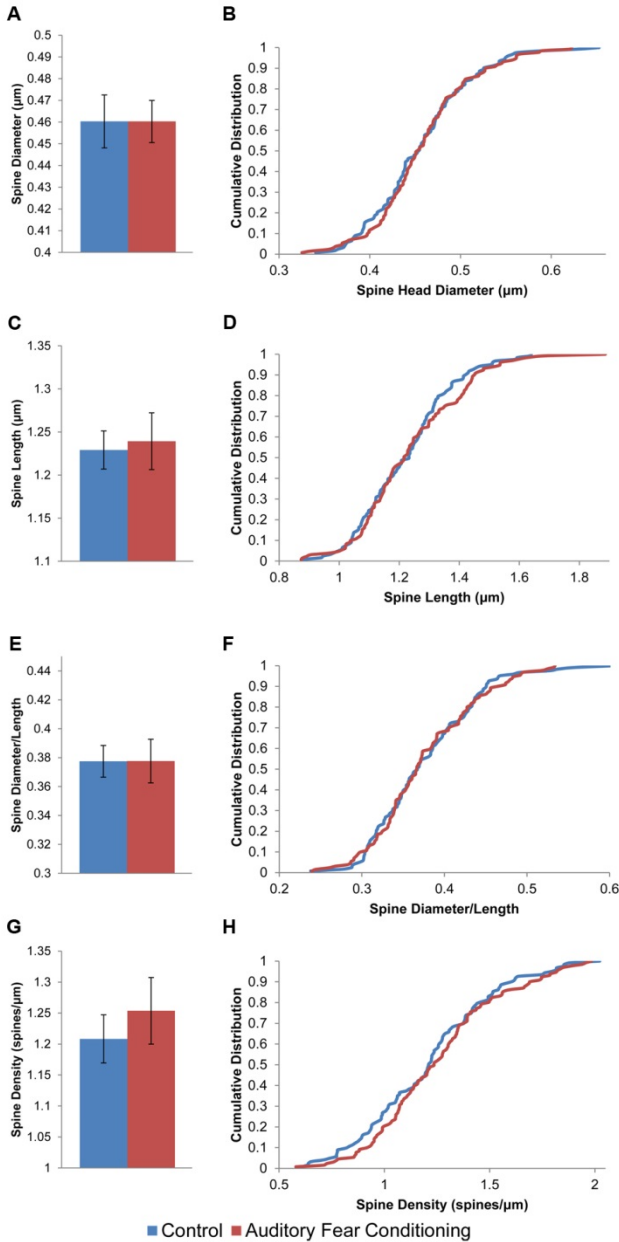

**Supplementary Figure 1. Auditory Fear Conditioning Does Not Lead to Changes in Dendritic Spine Density, Width, Length, or the Ratio of Width to Length in the Rhinal Cortex.**

(a) The bar graph shows no significant difference in average spine diameter between the auditory fear conditioning group and control ( $t$  test,  $n = 9$  auditory fear conditioning,  $n = 8$  control,  $P = 0.998$ ,  $t_{15} = 0.002$ ). (b) The cumulative distribution of the average spine head diameter for each dendritic length shows no significant differences between the auditory fear conditioning group when compared to controls (K-S test,  $n = 123$  and  $131$  for auditory fear conditioned and control group respectively,  $P = 0.871$ ,  $D = 0.0735$ ). (c) The bar graph shows no significant difference in average spine length between the auditory fear conditioning group and control ( $t$  test,  $n = 9$  auditory fear conditioning,  $n = 8$  control,  $P = 0.81$ ,  $t_{15} = 0.246$ ). (d) The cumulative distribution of the average spine length for each dendritic length shows no significant differences between the auditory fear conditioning group when compared to controls (K-S test,  $n = 123$  and  $131$  for auditory fear conditioned and control group respectively,  $P = 0.359$ ,  $D =$

0.1142). **(e)** The bar graph shows no significant difference in average ratio of the dendritic spine head diameter and length between the auditory fear conditioning group and control ( $t$  test,  $n = 9$  auditory fear conditioning,  $n = 8$  control,  $P = 0.99$ ,  $t_{15} = 0.0072$ ). **(f)** The cumulative distribution of the average spine length for each dendritic length shows no significant differences between the auditory fear conditioning group when compared to controls (K-S test,  $n = 123$  and  $131$  for auditory fear conditioned and control group respectively,  $P = 0.962$ ,  $D = 0.0622$ ). **(g)** The bar graph shows no significant difference in average dendritic spine density between the auditory fear conditioning group and control ( $t$  test,  $n = 9$  auditory fear conditioning,  $n = 8$  control,  $P = 0.52$ ,  $t_{15} = 0.657$ ). **(h)** The cumulative distribution of the average spine length for each dendritic length shows no significant differences between the auditory fear conditioning group when compared to controls (K-S test,  $n = 123$  and  $131$  for auditory fear conditioned and control group respectively,  $P = 0.569$ ,  $D = 0.0969$ ). Data are presented as mean  $\pm$  s.e.m.

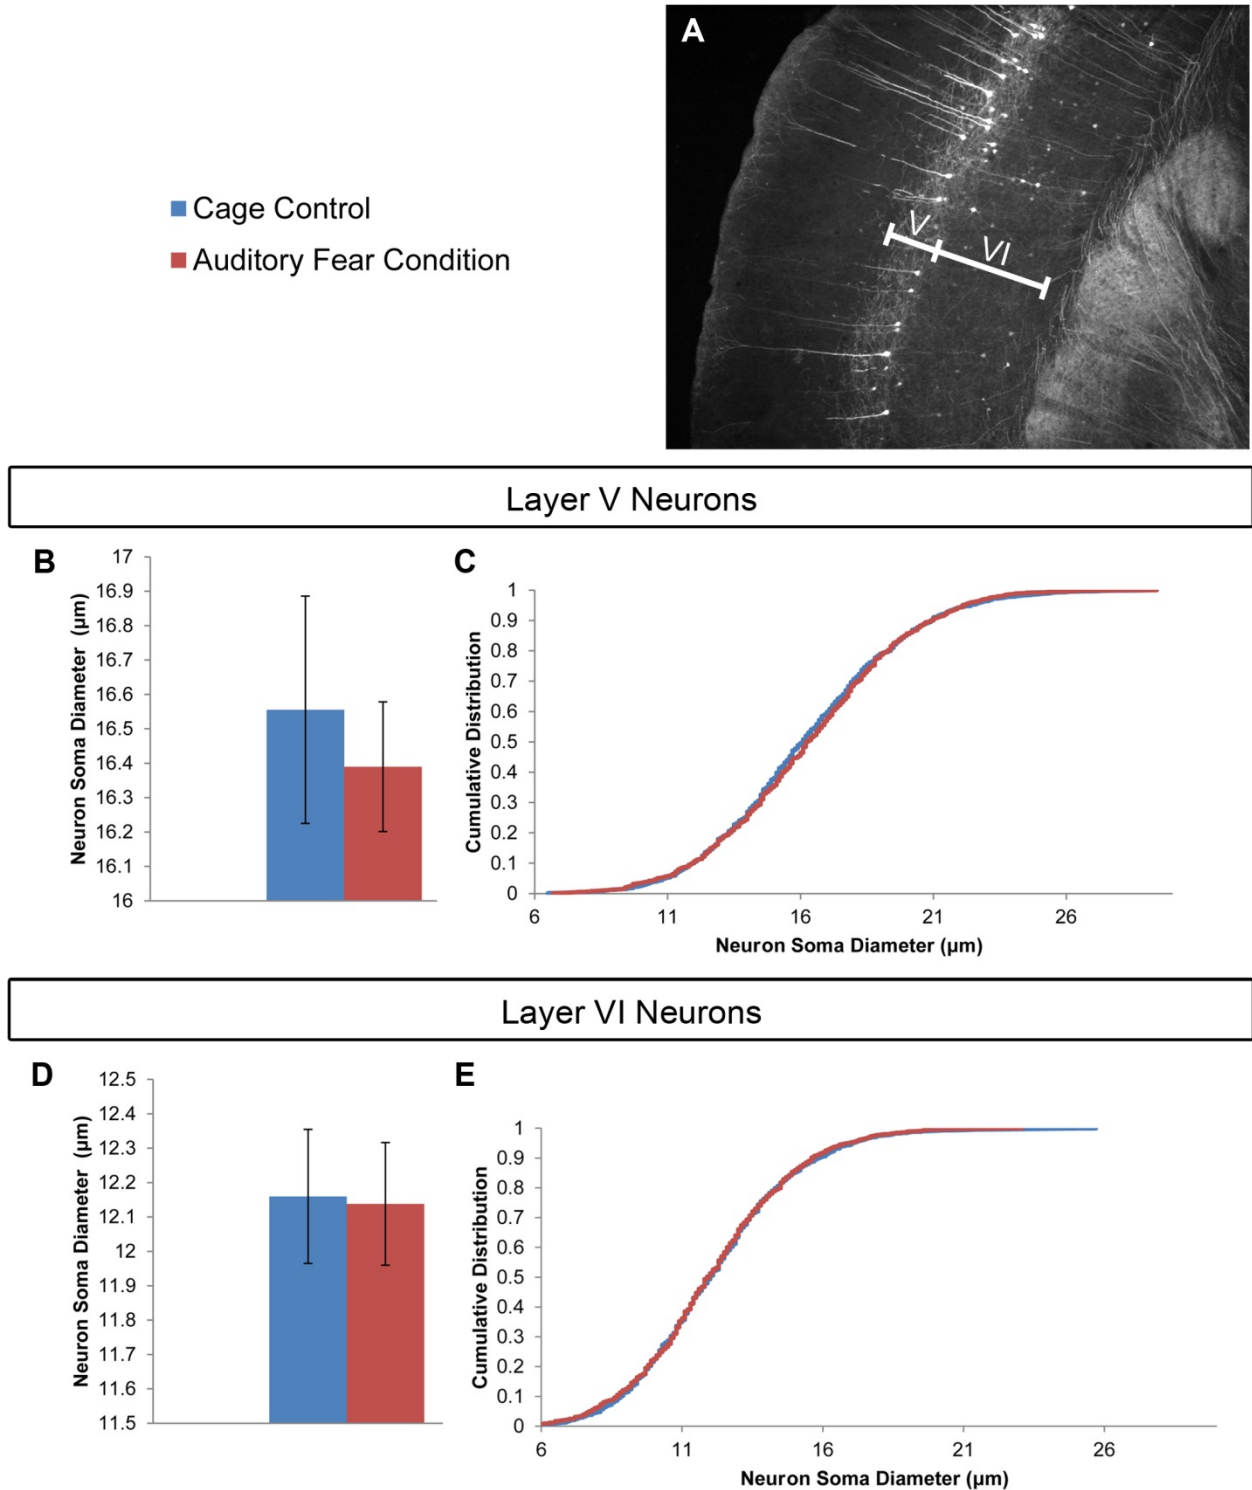

**Supplementary Figure 2. There are No Significant Changes in Layer V and VI Neuronal Soma Diameter with Auditory Fear Conditioning**

(a) Illustrative representative of how layer V and VI were defined based on the fluorescent pattern of the *Thy1*-YFP neurons (b) The bar graph shows no significant difference in average soma diameter for layer 5 neurons between the auditory fear conditioning group and control ( $t$  test,  $n = 9$  for both groups,  $P = 0.669$ ,  $t_{15} = 0.435$ ). (c) The cumulative distribution of the average

soma diameter showed no significant differences between the auditory fear conditioning group when compared to controls (K-S Test,  $n = 1665$  control and  $n = 1757$ ,  $P = 0.222$   $D = 0.036$ ).. Data are presented as mean  $\pm$  s.e.m.

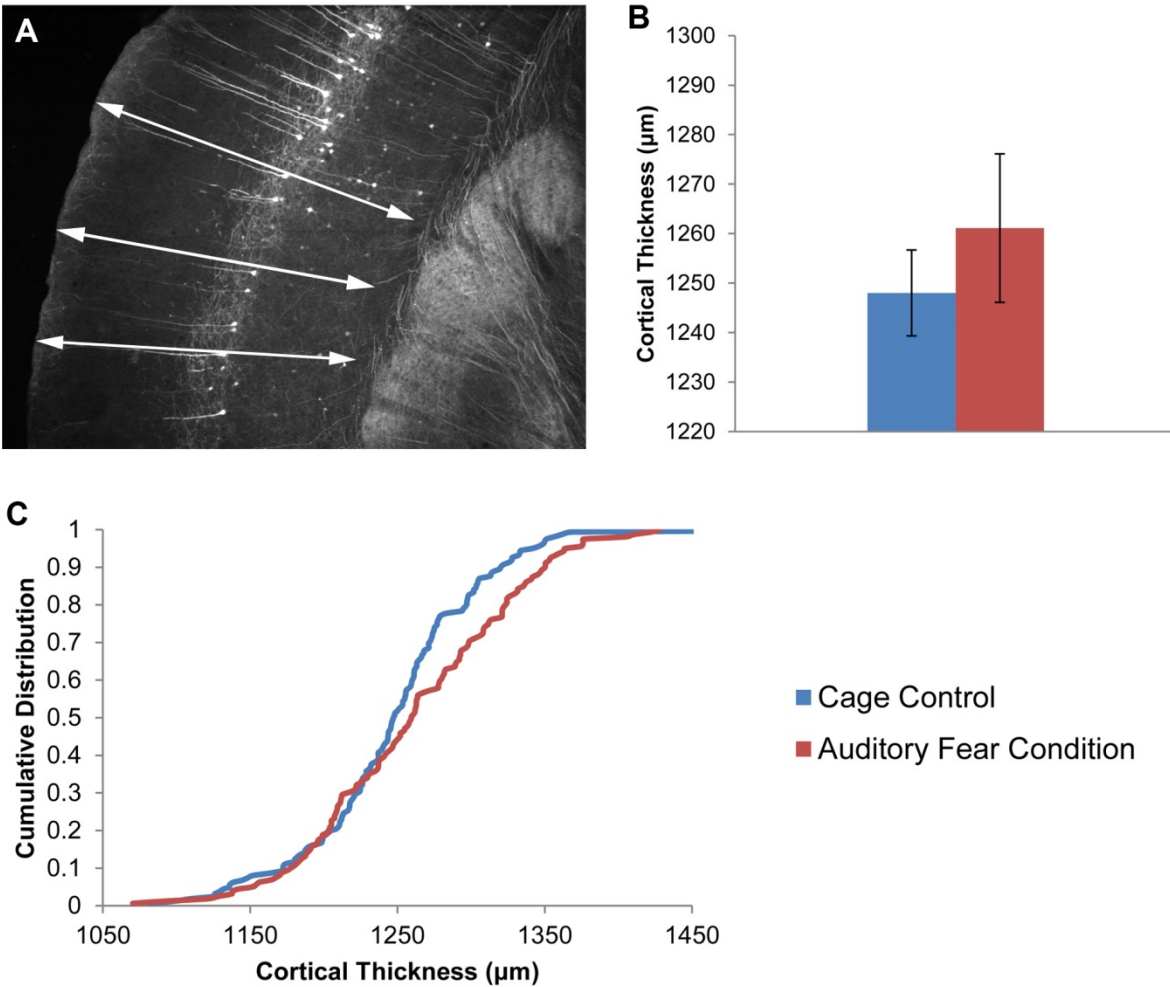

**Supplementary Figure 3. There are No Significant Changes in Auditory Cortex Cortical Thickness with Auditory Fear Conditioning.**

(a) Illustrative representative of the three measurements of the auditory cortex (b) The bar graph shows no significant difference in the average auditory cortex thickness between the auditory fear conditioning group and control ((t-test,  $n = 9$  per group,  $P = 0.46$ ,  $t_{16} = 0.756$ ). (c) The cumulative distribution of the cortex did show a significant difference between the auditory fear conditioning group when compared to controls (K-S test,  $n = 162$  for auditory fear conditioning,  $n = 159$  for control,  $P < 0.001$ ,  $D = 0.1808$ ). Data are presented as mean  $\pm$  s.e.m.
